# Supplementary material
Source: publisher figshare collection journal article supplement (https://future-science-group.figshare.com/ndownloader/files/30626427)
Supplement: Supplementary file 1 [file 30626427]

**Supplementary material**


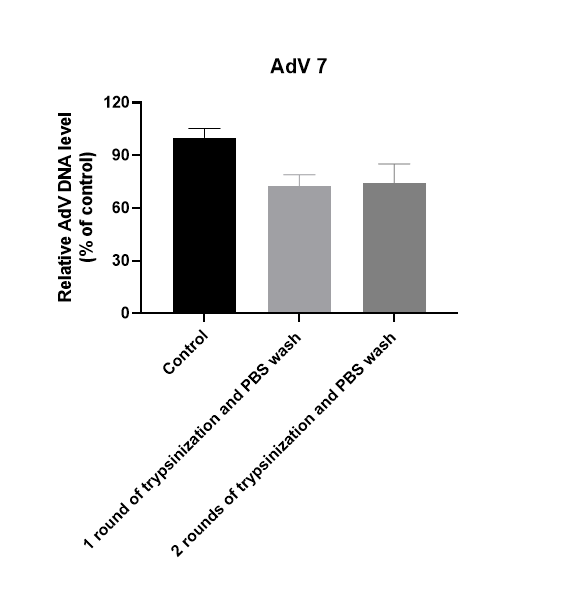


**Figure S1.** Removal of uninternalized virus from cell surface by trypsinization. Cells were first treated with 0.25% trypsin-EDTA for 5 min at 37 °C, and then washed 2 twice with PBS. Following washes, cells were pelleted and AdV DNA was quantified by qPCR.
